# Supplementary material for: Cyclooxygenase-2–dependent lymphangiogenesis promotes nodal metastasis of postpartum breast cancer
Source: JCI journal article supplement (doi:10.1172/jci73777), 2014-08-17
Supplement: sd1 [file 1]

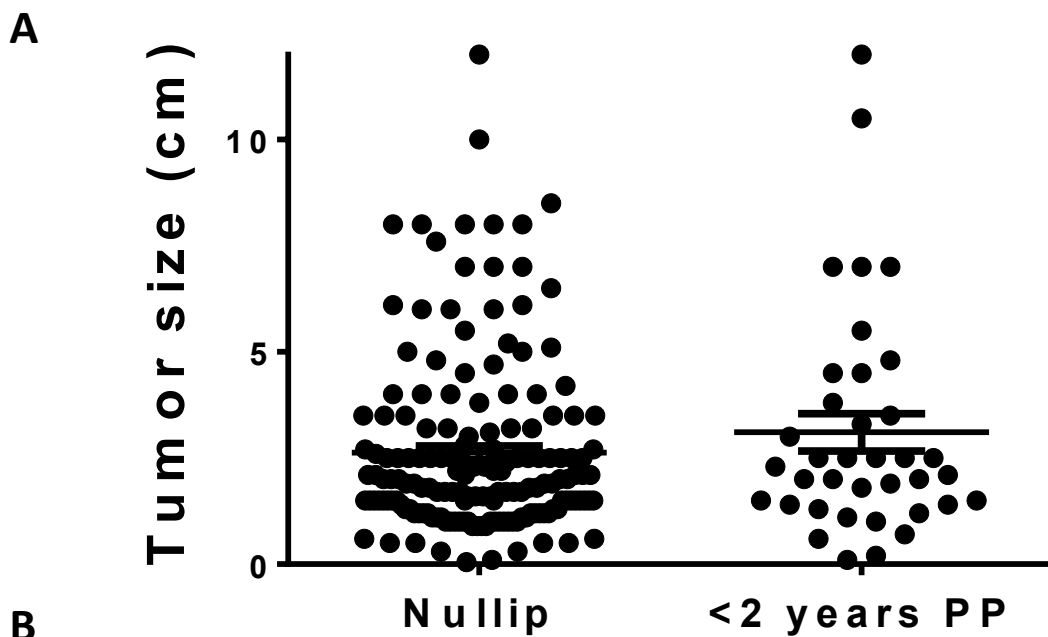

| Number of Cases Each Category (% each category) |         |         |           |           |           |          |
|-------------------------------------------------|---------|---------|-----------|-----------|-----------|----------|
| Group                                           | LumA    | LumB    | Her2      | TN        | Total (n) | Avg LVD  |
| NBP                                             | 4 (40%) | 2 (20%) | 1 (10%)   | 3 (30%)   | 10        | 3.15271  |
| ≤ 3                                             | 4 (40%) | 2 (20%) | 1 (10%)   | 3 (30%)   | 10        | 5.910766 |
| >3≤6                                            | 4 (44%) | 2 (22%) | 1 (11%)   | 2 (22.2%) | 9         | 4.257532 |
| >6≤10                                           | 4 (40%) | 2 (20%) | 1 (10%)   | 3 (30%)   | 10        | 3.901056 |
| >10≤15                                          | 4 (44%) | 2 (22%) | 1 (11%)   | 2 (22.2%) | 9         | 3.402957 |
| >15                                             | 4 (50%) | 2 (25%) | 1 (12.5%) | 1 (12.5)  | 8         | 2.521483 |

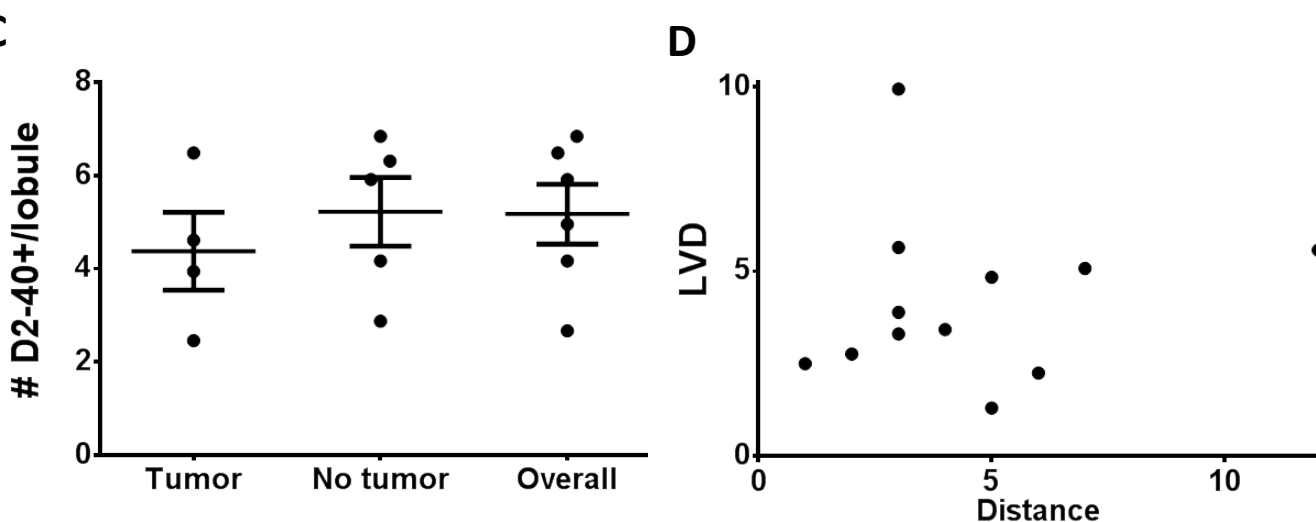

**Supplemental Figure 1: A)** Tumor size in the nulliparous (nullip) and <2 years postpartum (PP) groups. **B)** Reproductive category and biologic subtype of the clinical cohort used to analyze lymphatic vessel density and lymphatic invasion in postpartum cases. **C)** Analysis of LVD in normal tissues from women <1 year postpartum on the same section as tumor versus no tumor compared to overall average for all postpartum cases analyzed. **D)** Pearson analysis reveals no correlation between proximity to tumor and LVD in postpartum cases,  $r=0.01296$ ,  $p=0.69$ .

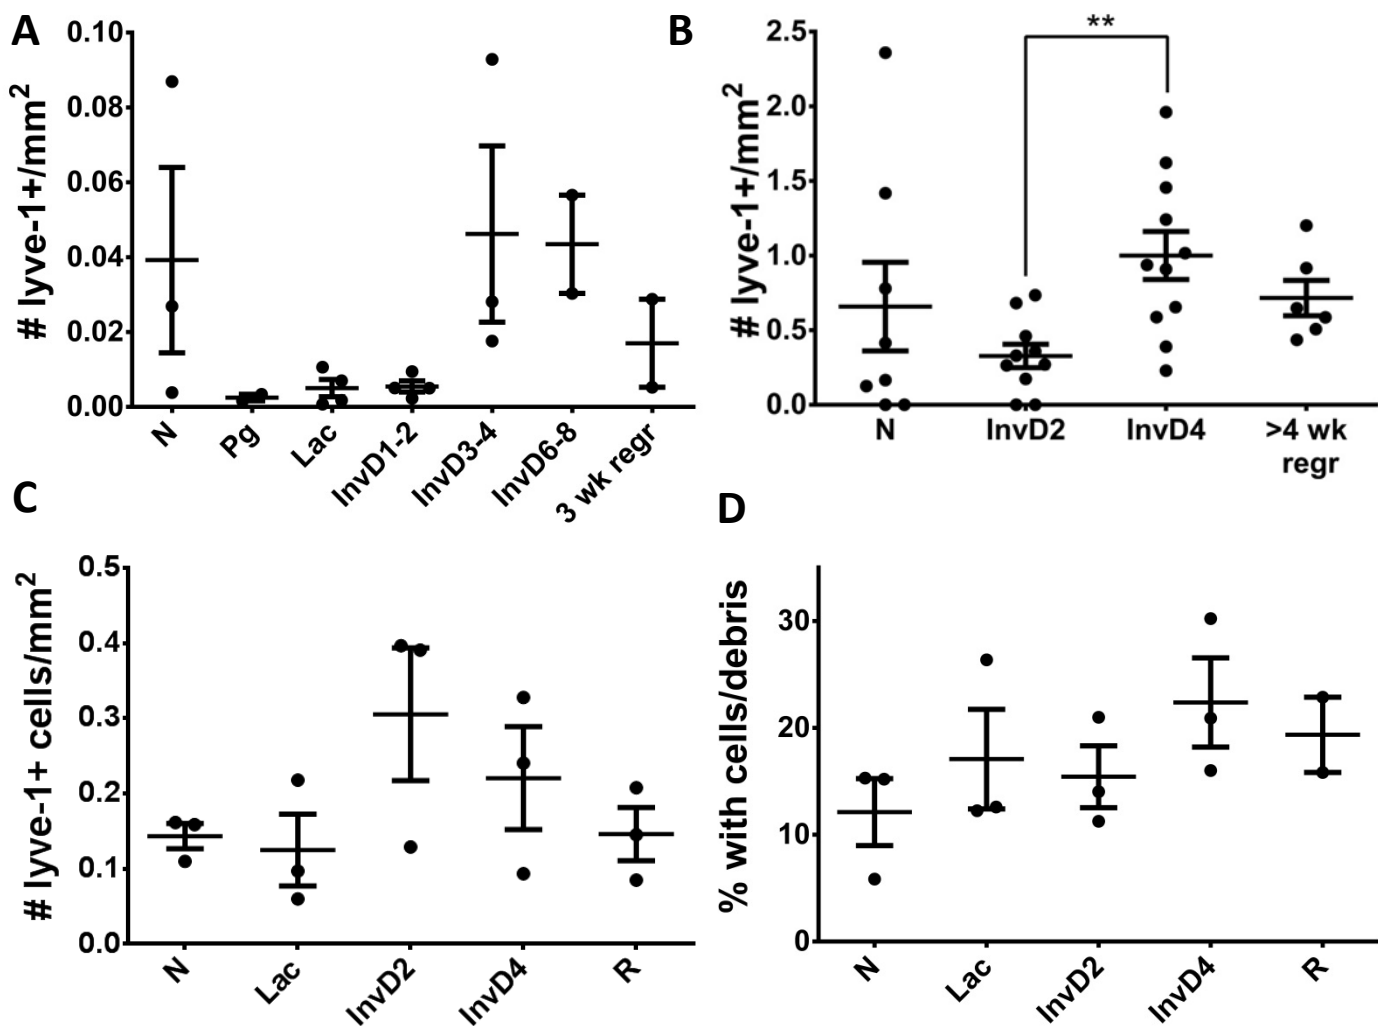

**Supplemental Figure 2:** A) Lyve-1+ vessels/mm<sup>2</sup> in mammary tissues from C57/Bl6 mice that were nulliparous (N), pregnant (Pg), Lac (lactating), undergoing involution (InvD1-2, InvD3-4, & InvD6-8), or fully regressed (3 wk regr). B) Lyve-1+ vessels/mm<sup>2</sup> in mammary tissues from ICR-SCID mice that were nulliparous, or undergoing involution (InvD2 and InvD4), or >4 weeks regressed. C) # lyve-1+ single cells/mm<sup>2</sup> in rat mammary tissues from nulliparous (N), lactating (Lac), undergoing early involution (InvD2 and InvD4), or fully regressed (R). D) % lyve-1+ vessels containing cells or cellular debris in rat mammary tissues. For each panel all data points, as well as Average and SEM, are depicted.

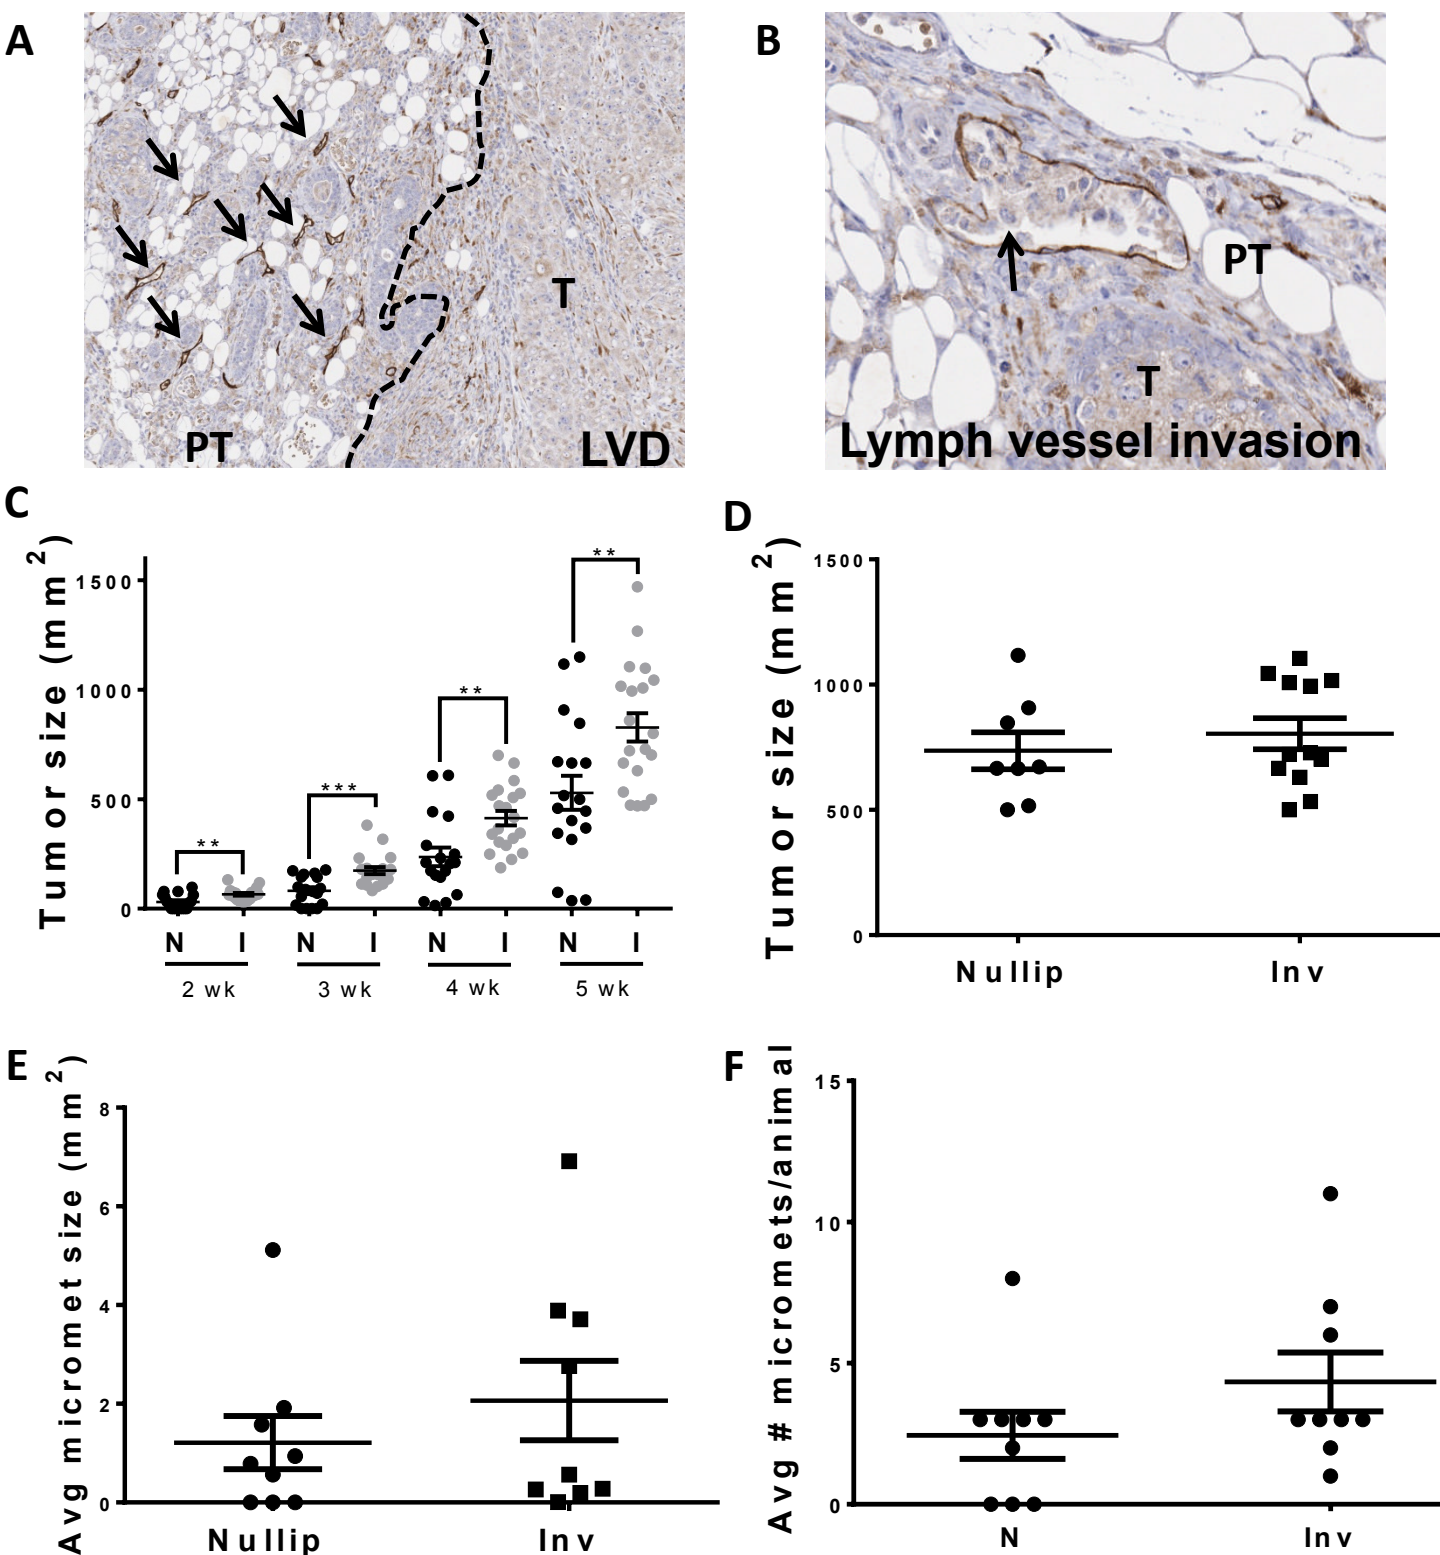

**Supplemental Figure 3:** A) Lyve-1 stained section from a postpartum group animal depicting Lyve-1+ vessel structures (arrows). B) Lyve-1 stained section from a postpartum group animal depicting lymphatic invasion by tumor cells (arrow). For all images T=tumor and PT=peritumor. C) Tumor size at 2, 3, 4, and 5 weeks post-injection when 66cl4 cells are injected into nulliparous or involution day 1 BALB-C dams. D) Tumor size matched group utilized for analysis of # lung clonogenic colonies per animal. E) Average lung micromet size by H&E analysis. F) Average number of lung micromets/animal by H&E analysis.

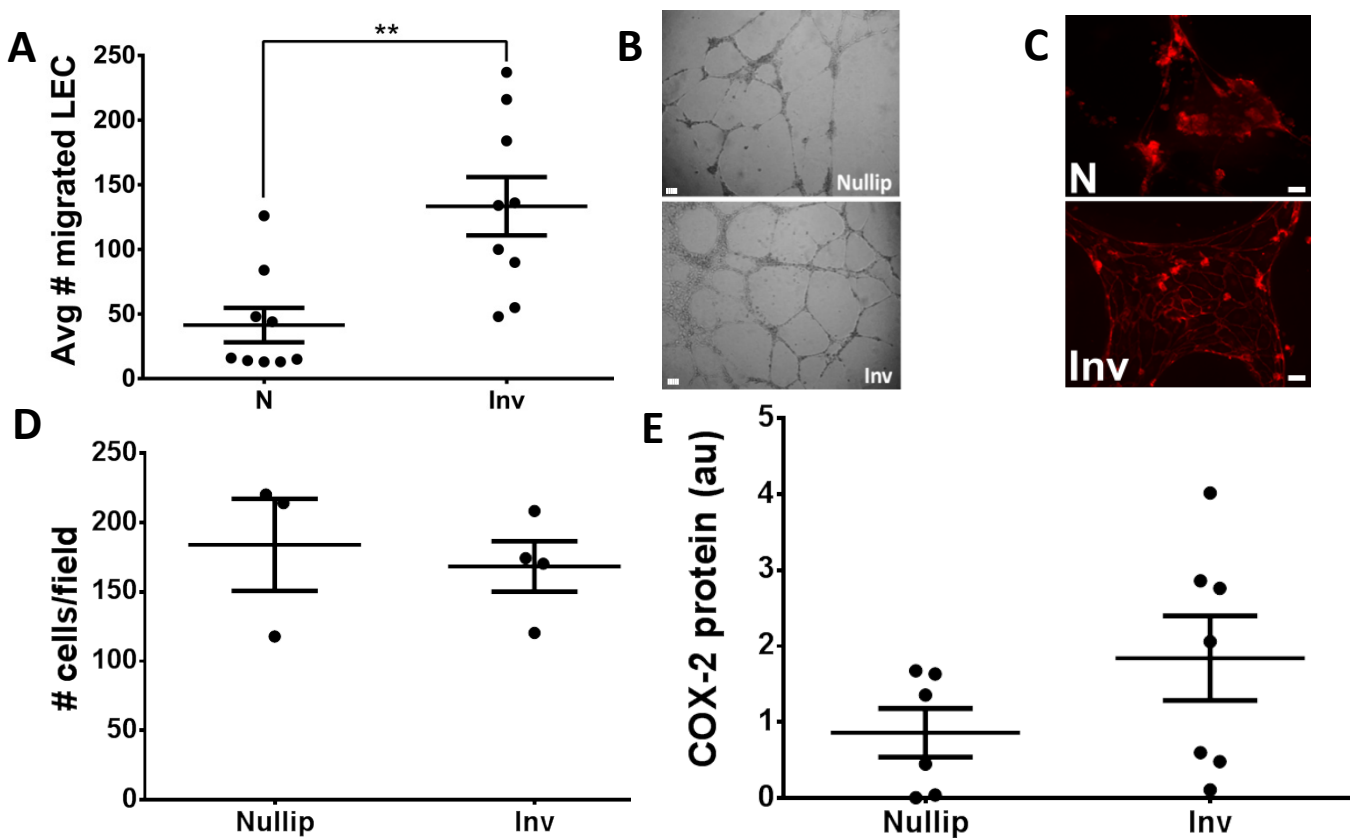

**Supplemental Figure 4:** A) Average number of lymphatic endothelial cells (LECs) migrated to the bottom of a transwell filter toward nulliparous (N) or involution (Inv) tumor cell populations, two-tailed t-test,  $**p < 0.01$ . B) Representative image of tube formation assay performed in the presence of nulliparous (Nullip) or postpartum (Inv) group tumor cell conditioned media. Scalebar=100mm. C) Image of tube formation assay stained for VE-cadherin. Scalebar=20mm. D) # cells per field in images taken from proliferation assays in the presence of tumor cell conditioned media. E) Western blot densitometry for COX-2 expression in lysates from nulliparous and involution group tumor cell populations.  $**p < 0.01$ . t-test.

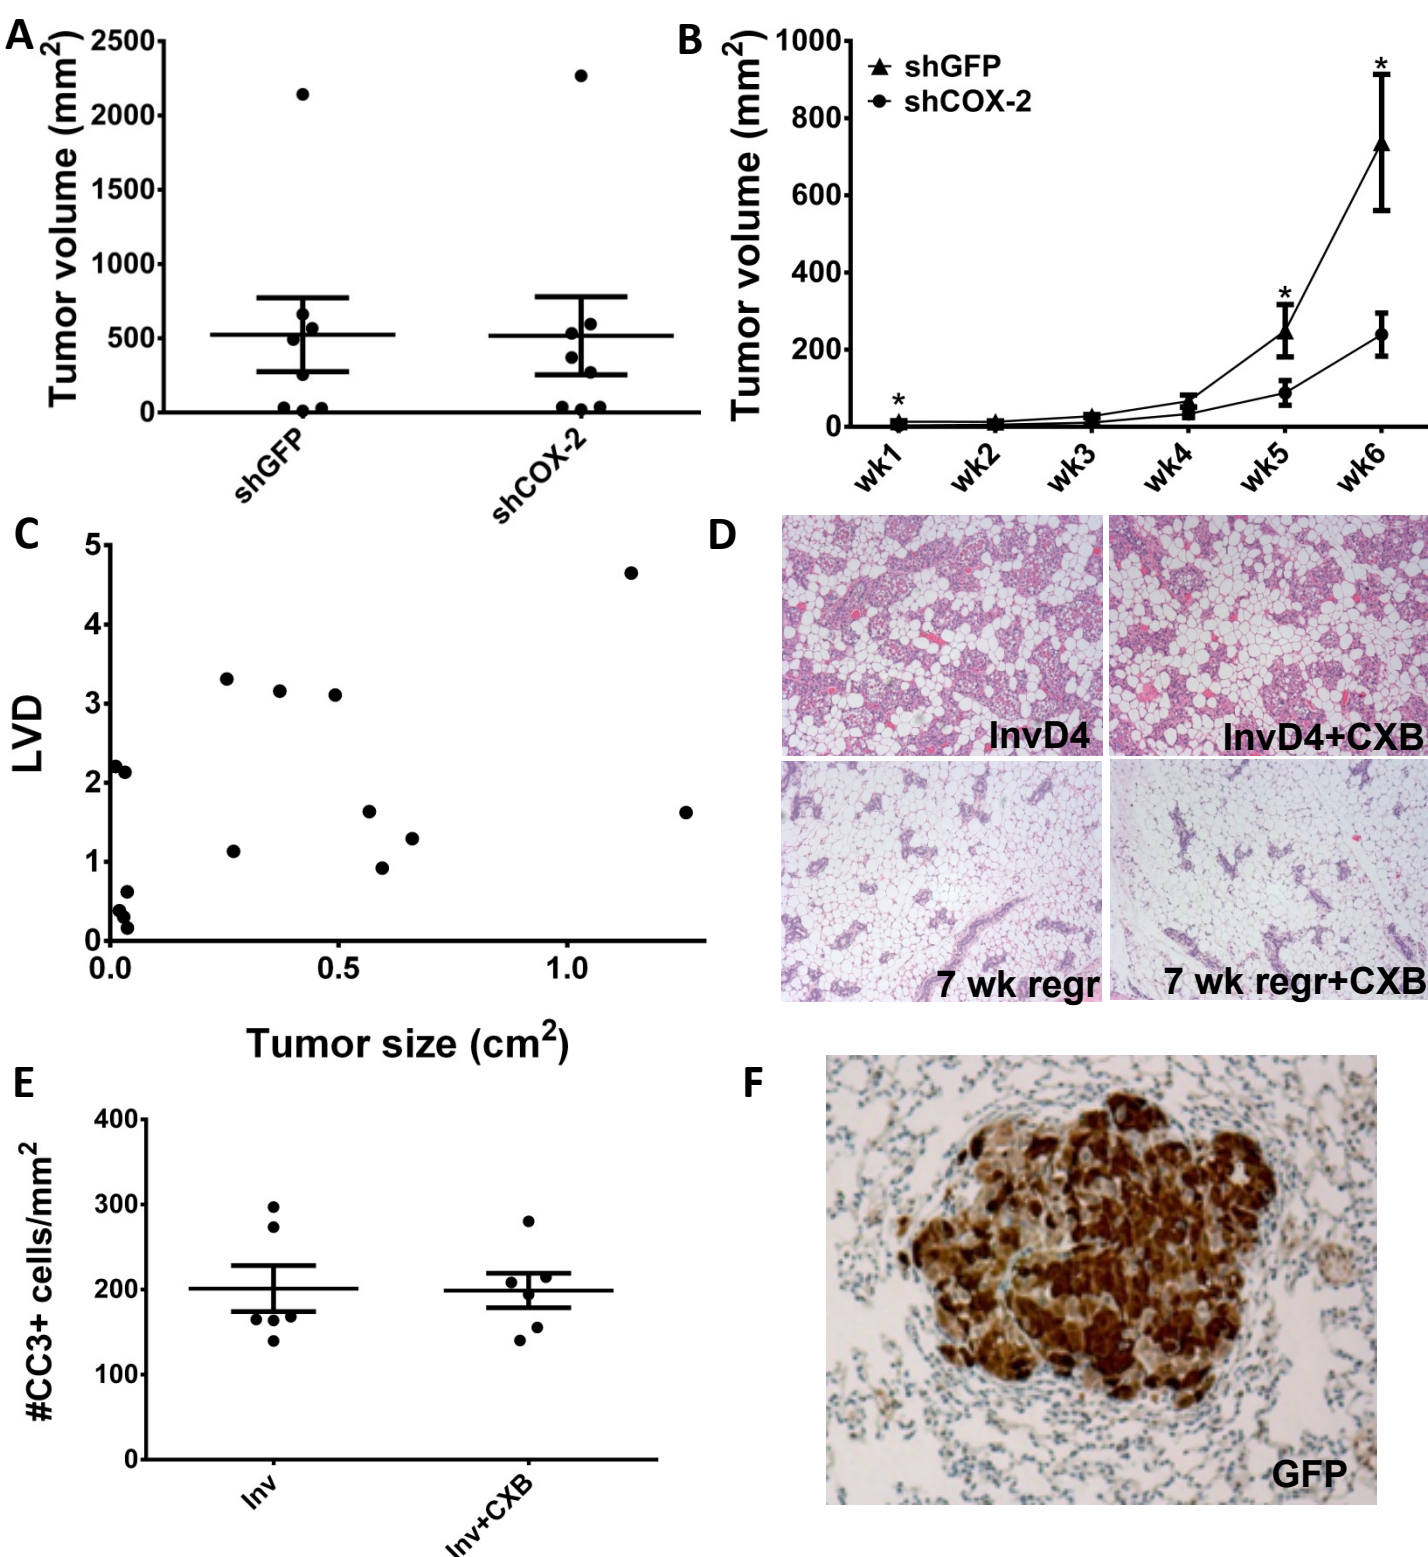

**Supplemental Figure 5:** A) Size matched group for analysis of lymphatic vessel density and invasion associated with shGFP and shCOX-2 MCF10DCIS tumors. B) Average tumor volume for postpartum animals injected with shGFP or shCOX-2 cells during involution. C) Pearson correlation analysis of tumor size and LVD,  $r=0.4579$ , n.s.  $p>0.05$ . D) H&E stained SCID mouse mammary tissues from Inv4 and 7 week regressed +/- CXB. E) # cleaved caspase 3 positive (CC3+) cells/mm<sup>2</sup> in SCID mouse mammary tissues at involution day 4. F) GFP stained tumor cells in mouse lung section (top) and H&E stained section from a postpartum group animal depicting LVI (arrow).
